# Supplementary material for: One-pot synthesis of yolk–shell mesoporous carbon spheres with high magnetisation
Source: Royal Society of Chemistry journal article supplement (doi:10.1039/c4ta01088d), 2014-01-01
Supplement: c4ta01088d1.pdf [file c4ta01088d1.pdf]

Electronic Supplementary Information

## One-pot synthesis of yolk–shell mesoporous carbon spheres with high magnetisation

Wen-jing Liu<sup>1</sup>, Yu-xin Liu<sup>2</sup>, Xiang-yang Yan<sup>1</sup>, Guo-ping Yong<sup>1</sup>, Ye-ping Xu<sup>2</sup>, Shao-min Liu<sup>\*,1</sup>

<sup>1</sup>Department of chemistry, University of Science and Technology of China, Hefei, Anhui, 230026, China, Tel&Fax: +86 551 3492147, E-mail: [liusm@ustc.edu.cn](mailto:liusm@ustc.edu.cn).

<sup>2</sup>Technology Center, Anhui Entry-Exit Inspection and Quarantine Bureau, Hefei 230022, P.R. China

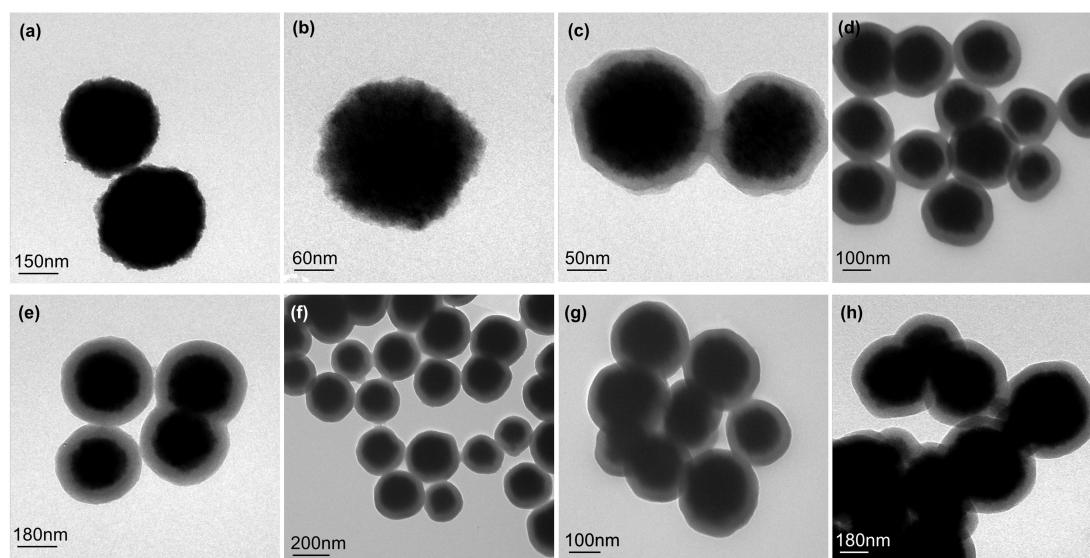

**Fig. S1** The composition of solvent's affection to Fe<sub>3</sub>O<sub>4</sub>@polymer : ethanol: water = 0:1 (a), 1:1 (b), 2:1 (c), 2.5:1 (d), 3:1 (e), 4:1 (f), 7:1 (g), 1:0 (h).

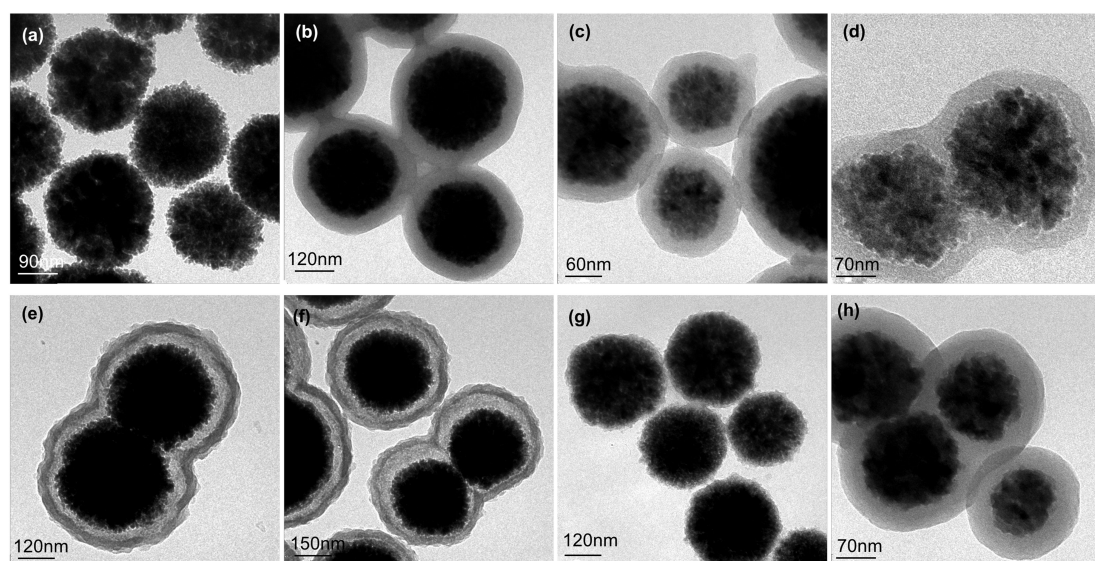

**Fig. S2** The content of TEOS's affection to  $\text{Fe}_3\text{O}_4@\text{vioid}@\text{C}$ : HCHO:TEOS = 1:0 (a); 1:0.2 (b); 1:0.6 (c); 1:1 (d); 1:1.5 (e); 1:1.8 (f); 1:5 (g); 0:1 (h).

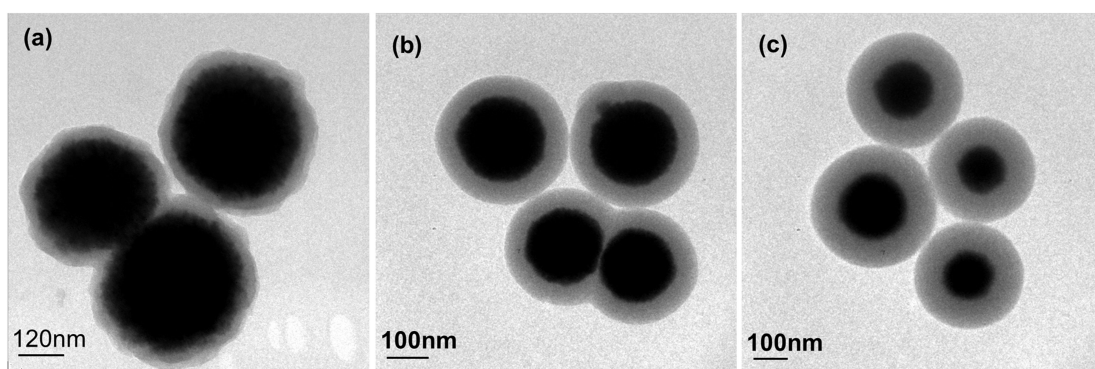

**Fig. S3** The dosage of precursor material' affection to Shell thickness of  $\text{Fe}_3\text{O}_4@\text{polymer}$  spheres: 40 nm (a); 60 nm (b); 80 nm (c).

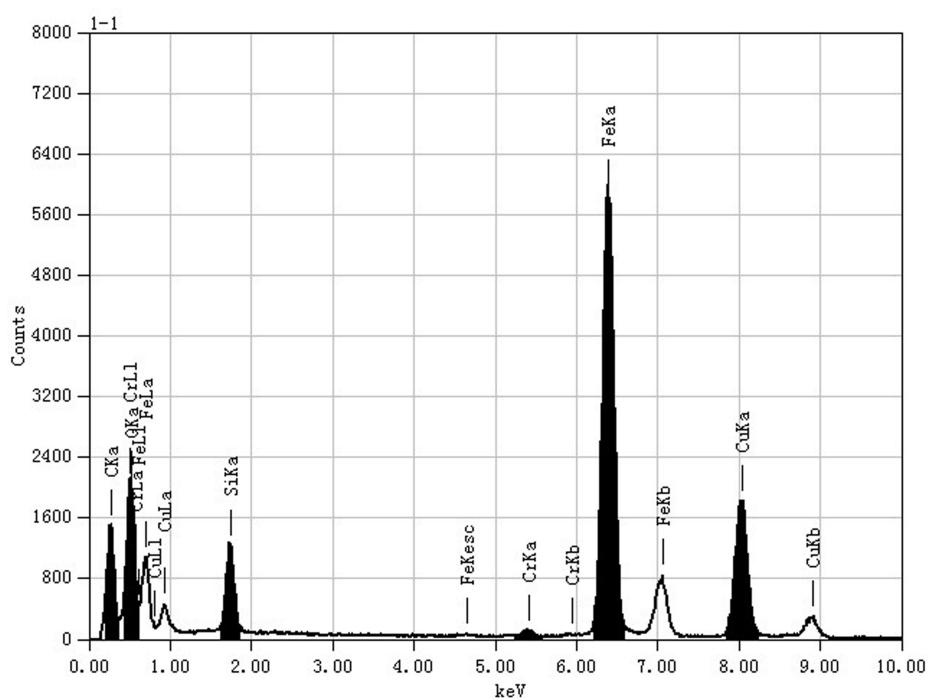

Fig. S4 The EDS of  $\text{Fe}_3\text{O}_4$ @polymer.

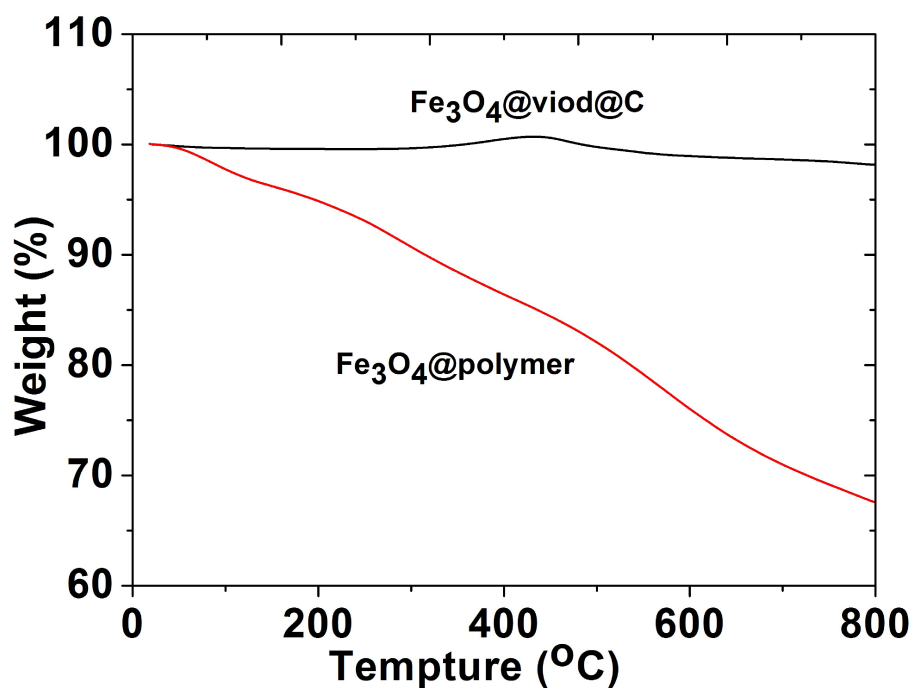

Fig. S5 Thermogravimetric (TG) analysis curves of mesoporous  $\text{Fe}_3\text{O}_4$ @void@C and  $\text{Fe}_3\text{O}_4$ @polymer.

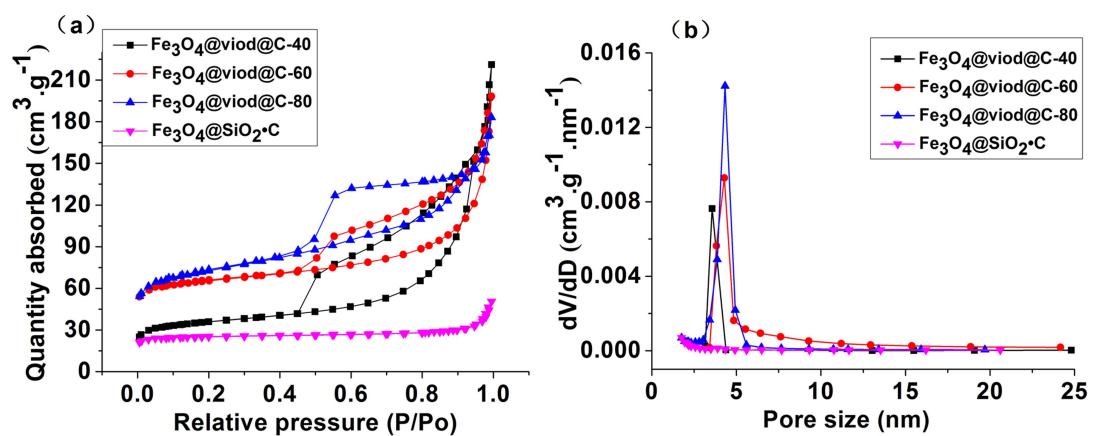

Fig. S6  $N_2$  sorption and adsorption curve of  $\text{Fe}_3\text{O}_4@void@C$  with 40 nm, 60 nm, 80 nm and  $\text{Fe}_3\text{O}_4@SiO_2 \cdot C$  (a), pore diameter distribution curve (b).
